# Supplementary material for: Nutrition habits in 24-hour mountain bike racers
Source: PubMed Central journal article supplement (PMC4320206; doi:10.1186/2193-1801-3-715), 2014-12-09

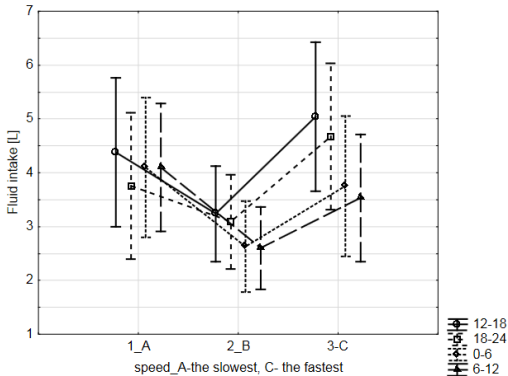

Supplement: 40064_2014_1483_MOESM2_ESM.pdf [file 40064_2014_1483_MOESM2_ESM.pdf]
